# Supplementary material
Source: ML conference proceedings conference paper supplement (https://openaccess.thecvf.com/content/CVPR_2019/html/Wang_Characterizing_and_Avoiding_CVPR_2019_paper.html)
Supplement: Supplementary file 1 [file Wang_Characterizing_and_Avoiding_CVPR_2019_supplemental.pdf]

## A. Negative Transfer Definition

In this section we show how the negative transfer condition (NTC) in Eq.(3) is derived.

The intuitive definition given earlier in Section 3 does not lead to a rigorous definition. There are two key questions that are not clear: (1) Should negative transfer be defined to be algorithm-specific? (2) What is the negative impact being compared with?

First, if negative transfer is completely algorithm-agnostic, then its definition would be independent to which transfer learning algorithm is being used. Mathematically, this may yield the following:

$$\min_A R_{P_T}(A(\mathcal{S}, \mathcal{T})) > \min_{A'} R_{P_T}(A'(\emptyset, \mathcal{T})). \quad (12)$$

However, it is easy to see that this condition is never satisfied. To show this, given source data  $\mathcal{S}$  and target data  $\mathcal{T}$ , consider an algorithm  $A_1$  that minimizes the expected risk on the RHS:

$$A_1 \in \operatorname{argmin}_{A'} R_{P_T}(A'(\emptyset, \mathcal{T})).$$

Then we can always construct a new algorithm  $A'_1$  such that  $A'_1(\mathcal{S}, \mathcal{T}) = A'(\emptyset, \mathcal{T})$ , i.e.  $A'_1$  always ignores the source data. As a result, we must have:

$$\begin{aligned} \min_A R_{P_T}(A(\mathcal{S}, \mathcal{T})) &\leq R_{P_T}(A'_1(\mathcal{S}, \mathcal{T})) \\ &= R_{P_T}(A_1(\emptyset, \mathcal{T})) \\ &= \min_{A'} R_{P_T}(A'(\emptyset, \mathcal{T})) \end{aligned} \quad (13)$$

Therefore, the condition defined in Eq.(12) is never true and we conclude that negative transfer must be algorithm-specific. This answers the first question.

Given the answer, the condition in Eq.(12) could be modified to consider only a specific transfer algorithm  $A$ , i.e.,

$$R_{P_T}(A(\mathcal{S}, \mathcal{T})) > \min_{A'} R_{P_T}(A'(\emptyset, \mathcal{T})). \quad (14)$$

However, there are still two problems with this definitions:

- (a) This condition cannot be measured in practice since we cannot evaluate the RHS even at test time;
- (b) An algorithm that does not utilize any source at all still satisfies the condition, which is counterintuitive. For instance, consider a degenerated algorithm  $A_2$  such that  $A_2(\mathcal{S}, \mathcal{T}) = A_2(\emptyset, \mathcal{T})$  and  $R_{P_T}(A_2(\emptyset, \mathcal{T})) > \min_{A'} R_{P_T}(A'(\mathcal{S}, \mathcal{T}))$ . This algorithm does not perform any meaningful transfer from the source, but negative transfer occurs in this case according to Eq. (14) since:

$$R_{P_T}(A_2(\mathcal{S}, \mathcal{T})) = R_{P_T}(A_2(\emptyset, \mathcal{T})) > \min_{A'} R_{P_T}(A'(\emptyset, \mathcal{T})).$$

Therefore, it is misleading to only compare with the best possible algorithm and we propose the following definition:

**Definition 1 (Negative Transfer).** Given a source dataset  $\mathcal{S}$ , a target dataset  $\mathcal{T}$  and a transfer learning algorithm  $A$ , the negative transfer condition (NTC) is defined as:

$$R_{P_T}(A(\mathcal{S}, \mathcal{T})) > R_{P_T}(A(\emptyset, \mathcal{T})) \geq \min_{A'} R_{P_T}(A'(\emptyset, \mathcal{T})), \quad (15)$$

which is exactly Eq.(3) since the “ $\geq$ ” constraint on the right side is true for any  $A$ . This definition of NTC resolves the two questions mentioned above. Furthermore, it is consistent with the intuitive definition and is also tractable at test time.
